# Supplementary material for: General fabrication and enhanced VOC gas-sensing properties of hierarchically porous metal oxides
Source: Royal Society of Chemistry journal article supplement (doi:10.1039/c7ra06808e), 2017-01-01
Supplement: c7ra06808e1.pdf [file c7ra06808e1.pdf]

## Support Information

### General fabrication and enhanced gas-sensing properties of hierarchically porous metal oxides for volatile organic compounds

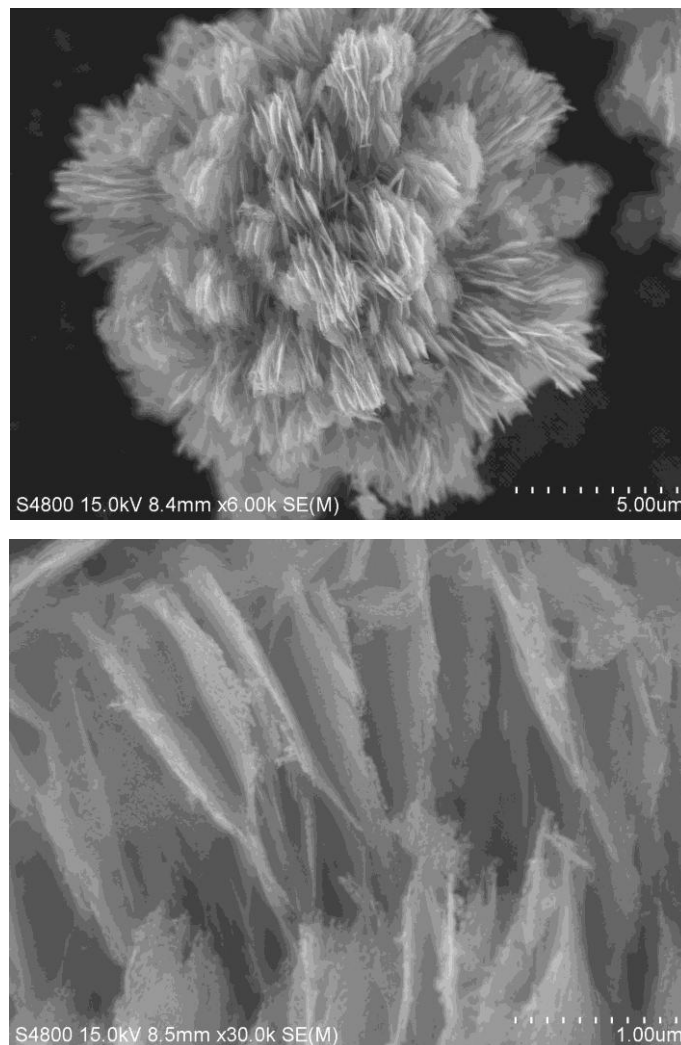

**Figure S1.** SEM image of porous ZnO

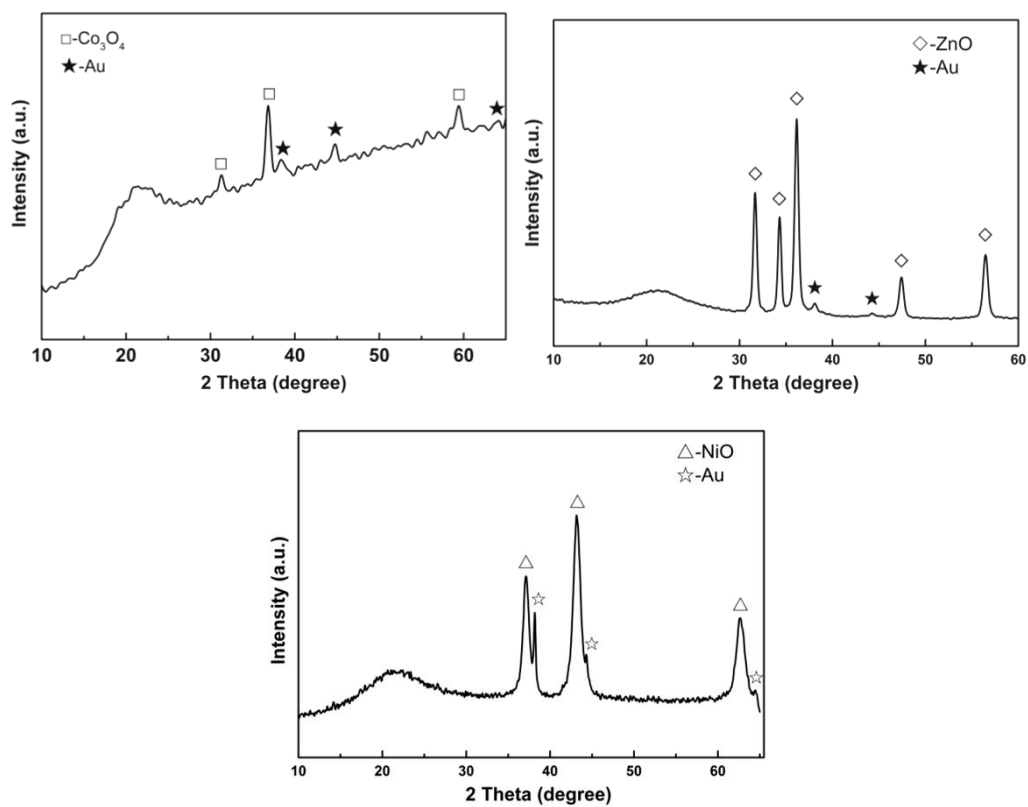

**Figure S2.** XRD patterns of  $\text{Co}_3\text{O}_4$ -Au, ZnO-Au and NiO-Au.

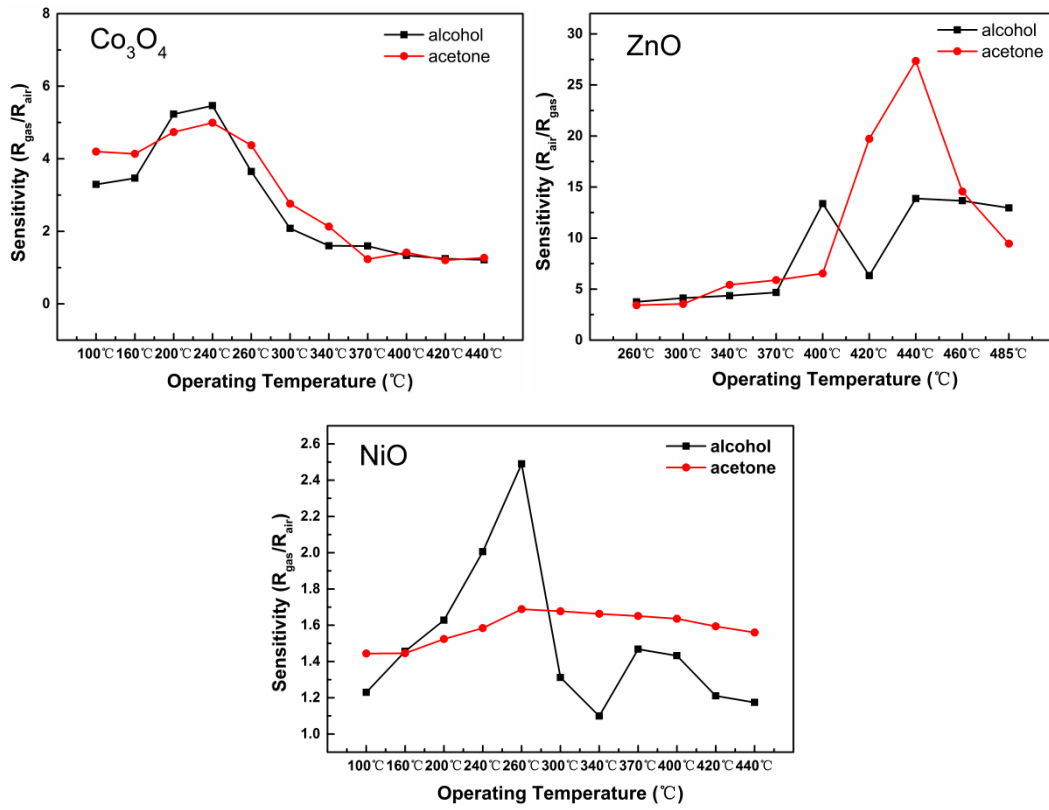

**Figure S3.** The best operating temperature of Co<sub>3</sub>O<sub>4</sub>, ZnO, and NiO.

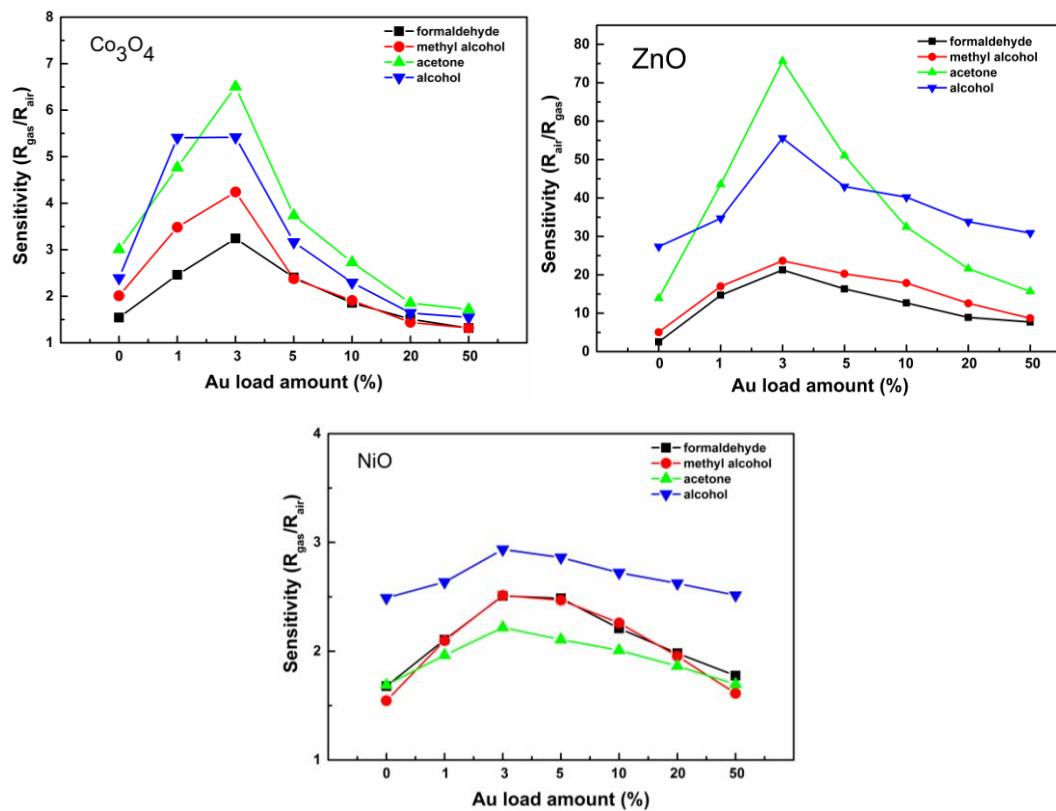

**Figure S4.** The best Au load amount of surface modification
